# Supplementary material for: Entry of cannabidiol into the fetal, postnatal and adult rat brain
Source: Springer Nature journal article supplement (doi:10.1007/s00441-024-03867-w), 2024-02-17
Supplement: MOESM1 [file 441_2024_3867_MOESM1_ESM.pdf]

## Supplementary Information (SI)

### Supplementary Figure Legends

**Supplementary Fig. 1** Entry of cannabidiol into fetal brain and CSF. 1a, cannabidiol derived via placental transfer from *i.v.* injected dam; 1b, 1c and 1d, cannabidiol injected *i.p.* into individual animals. For all graphs, each point represents a single fetus or pup, bars are Mean  $\pm$ SD. For all ages data from Fig. 5 subdivided by sex. 1a E19 pregnant rat injected with cannabidiol *i.v.*, 10 mg/kg, n = 10 female, n = 8 male. 1a E19 fetuses injected with cannabidiol *i.p.*, 10 mg/kg, n = 8 female, n = 3 male. 1c P4 day pups injected with cannabidiol *i.p.*, 10 mg/kg, n = 5 for each sex. 1d P12 day pups injected with cannabidiol *i.p.*, 10 mg/kg, n = 3 female, n = 2 male. Note no significant difference between values for male and female for either brain or CSF at any age.

**Supplementary Fig. 2** Coomassie stain of PAGE separated plasma at different ages.

Note E19 plasma sample was pooled from multiple animals. From left to right samples are: adult (non-pregnant) female, P 12, P4 and embryonic day E19. Molecular standards on the right.

**Supplementary Table 1** Dose response of entry of *i.p.* cannabidiol into brain and CSF.

|           | Cannabidiol Dose (mg/kg) |                  |                   |                  |
|-----------|--------------------------|------------------|-------------------|------------------|
|           | 0.1                      | 1                | 10                | 50               |
| Cortex    | 41.4<br>(35, 48)         | 38.6<br>(43, 34) | 44.1±4.0<br>n = 5 | 58.0<br>(51, 64) |
| Brainstem | 42.9<br>(40, 46)         | 36.6<br>(52, 22) | 49.4±4.6<br>n = 5 | 61.5<br>(56, 67) |
| CSF       | 12.1<br>(18, 6)          | 20.8<br>(34, 7)  | 15.2±2.0<br>n = 5 | 38.2<br>(41, 35) |

P12 day rat pup cortex, brainstem and CSF. Values are cortex or brainstem/plasma or CSF/plasma ratio %. Average of n = 2 individual animals at each dose. Individual values in brackets except at 30 min where mean +/- SD, n = 5. Data illustrated in Fig. 1.

**Supplementary Table 2** Time course of entry of *i.p.* cannabidiol into brain and CSF.

|           | Time (min)       |                   |                  |                  |
|-----------|------------------|-------------------|------------------|------------------|
|           | 15               | 30                | 60               | 120              |
| Cortex    | 31.1<br>(35, 28) | 44.1±4.0<br>n = 5 | 50.7<br>(53, 48) | 56.8<br>(64, 49) |
| Brainstem | 34.4<br>(36, 32) | 49.4±4.6<br>n = 5 | 58.2<br>(62, 54) | 62.9<br>(70, 56) |
| CSF       | 8.6<br>(8, 9)    | 15.2±2.0<br>n = 5 | 31.0<br>(16, 46) | 13.3<br>(14, 13) |

P12 day rat pup 10 mg/kg, brain and CSF. Values are cortex or brainstem/plasma or CSF/plasma ratio %. Average of n = 2 individual animals at each time point. Individual values in brackets except at 30 min where mean +/- SD, n = 5. Data illustrated in Fig. 2.

**Supplementary Table 3** E19 Fetus Cortex or brainstem/plasma or CSF/plasma ratio %.

## Dam 1

| Time (min) | Cortex | Brainstem | CSF |
|------------|--------|-----------|-----|
| 30         | 73     | 82        | 22  |
| 36         | 107    | 108       | 29  |
| 47         | 89     | 96        | 25  |
| 62         | 117    | 135       | 37  |
| 70         | 117    | 127       | 35  |
| 80         | 134    | 140       | 47  |
| 91         | 102    | 115       | 25  |

## Dam 2

| Time (min) | Cortex | Brainstem | CSF |
|------------|--------|-----------|-----|
| 30         | 88     | 89        | 20  |
| 36         | 106    | 106       | 24  |
| 46         | 85     | 83        | 30  |
| 62         | 114    | 128       | 40  |
| 72         | 104    | 97        | 36  |

## Dam 3

| Time (min) | Cortex | Brainstem | CSF |
|------------|--------|-----------|-----|
| 41         | 117    | 109       | 42  |
| 56         | 100    | 135       | 21  |
| 67         | 102    | 130       | 51  |
| 78         | 117    | 133       | 19  |
| 90         | 116    | 117       | 35  |
| 100        | 107    | 101       | 28  |

Cannabidiol (10 mg/kg) administered *i.v.* to dams from 30 to 100 min.

Data illustrated in Fig. 5.

**Supplementary Table 4** Cannabidiol protein binding to separated plasma protein.

| Cut | E19  | P4    |       |       | P12   |       |       |       | Adult (non-pregnant)<br>female |       |       |
|-----|------|-------|-------|-------|-------|-------|-------|-------|--------------------------------|-------|-------|
| 0.5 | 2.77 | 9.82  | 10.67 | 11.90 | 15.07 | 14.65 | 12.96 | 19.38 | 29.61                          | 17.04 | 13.90 |
| 1   | 2.36 | 3.12  | 6.20  | 10.90 | 11.59 | 13.83 | 8.31  | 22.66 | 4.41                           | 6.49  | 23.18 |
| 1.5 | 6.14 | 7.61  | 8.00  | 6.70  | 9.76  | 9.52  | 12.45 | 8.19  | 17.93                          | 7.96  | 16.39 |
| 2   | 3.21 | 5.70  | 13.21 | 8.62  | 7.54  | 9.96  | 14.53 | 10.96 | 16.59                          | 12.73 | 11.08 |
| 2.5 | 3.30 | 6.08  | 18.87 | 10.98 | 13.01 | 16.72 | 19.33 | 15.06 | 12.98                          | 16.84 | 14.62 |
| 3   | 7.90 | 11.50 | 17.23 | 7.76  | 16.85 | 14.25 | 16.71 | 13.31 | 16.78                          | 18.48 | 11.10 |
| 3.5 | 6.39 | 8.77  | 13.68 | 5.14  | 11.10 | 7.17  | 15.17 | 6.65  | 14.56                          | 15.24 | 5.97  |
| 4   | 2.70 | 4.97  | 15.73 | 5.13  | 4.88  | 5.49  | 14.17 | 5.22  | 4.42                           | 14.71 | 5.71  |
| 4.5 | 2.24 | 3.04  | 13.94 | 4.39  | 4.02  | 4.60  | 12.81 | 4.75  | 3.89                           | 13.87 | 4.33  |
| 5   | 2.05 | 2.57  | 11.44 | 4.05  | 3.16  | 3.68  | 11.20 | 3.99  | 3.67                           | 10.03 | 4.37  |
| 5.5 | 1.69 | 2.20  | 10.80 | 3.26  | 2.95  | 2.98  | 10.58 | 3.89  | 2.75                           | 8.11  | 3.78  |
| 6   | 1.64 | 2.08  | 11.66 | 3.62  | 2.64  | 2.69  | 7.48  | 3.42  | 2.89                           | 8.37  | 3.23  |
| 6.5 | 6.60 | 1.66  | 9.76  | 3.70  | 3.16  | 2.87  | 8.67  | 4.38  | 2.03                           | 9.01  | 3.11  |

Cannabidiol protein binding to separated plasma protein on SDS-PAGE gels at different ages.

Binding of cannabidiol is expressed as disintegrations per minute (DPM) divided by the weight of the gel sample (mg). First gel segment (0.5, italicised) was removed from calculation as it represents large molecular weight compounds that were likely to be long chain fatty acids, which may bind cannabidiol. The ratio of albumin binding at each age was calculated using equation:

$$\text{Albumin Binding (\%)} = \frac{\text{Total Albumin Fraction Bound Counts (DPM/mg)}}{\text{Total Plasma Protein Bound Counts (DPM/mg)}} \times 100\%.$$

**Supplementary Table 5** Cannabidiol receptors in brain, choroid plexus and placenta.

| GeneID       | Symbol         | Brain |       |           |           | Choroid plexus |       |           |           | Placenta |
|--------------|----------------|-------|-------|-----------|-----------|----------------|-------|-----------|-----------|----------|
|              |                | E19   | P5    | Adult (M) | Adult (F) | E19            | P5    | Adult (M) | Adult (F) | E19      |
| NM_012784    | <i>Cnr1</i>    | 492.1 | 344.4 | 297.4     | 247.7     | 45.2           | 11.7  | 1.0       | 0.5       | 0.7      |
| NM_020543    | <i>Cnr2</i>    | 0.1   | 0.1   | 0.1       | 0.1       | 0.1            | 0.1   | 0.1       | 0.1       | 0.1      |
| NM_001164142 | <i>Cnr2</i>    | 0.1   | 0.1   | 0.1       | 0.1       | 0.1            | 0.1   | 0.1       | 0.1       | 0.1      |
| NM_001164143 | <i>Cnr2</i>    | 0.1   | 0.1   | 0.1       | 0.1       | 0.1            | 0.1   | 0.1       | 0.1       | 0.1      |
| NM_012556    | <i>Fabp1</i>   | 0.1   | 0.1   | 0.1       | 0.1       | 0.1            | 0.1   | 0.1       | 0.1       | 0.1      |
| NM_031982    | <i>Trpv1</i>   | 0.8   | 0.6   | 1.2       | 1.3       | 1.3            | 1.8   | 2.0       | 1.4       | 7.7      |
| NM_001270798 | <i>Trpv2</i>   | 0.1   | 0.1   | 0.1       | 0.1       | 0.1            | 0.1   | 0.1       | 0.1       | 0.1      |
| NM_001270797 | <i>Trpv2</i>   | 0.1   | 0.1   | 0.1       | 0.1       | 0.1            | 0.1   | 0.1       | 0.1       | 0.1      |
| NM_017207    | <i>Trpv2</i>   | 0.1   | 0.1   | 0.1       | 0.1       | 0.1            | 0.1   | 0.1       | 0.1       | 0.1      |
| NM_001025757 | <i>Trpv3</i>   | 0.3   | 0.5   | 0.5       | 0.5       | 0.2            | 0.1   | 0.2       | 0.2       | 4.6      |
| NM_023970    | <i>Trpv4</i>   | 0.2   | 0.7   | 0.7       | 0.9       | 78.6           | 228.1 | 259.0     | 286.2     | 0.5      |
| NM_134371    | <i>Trpm8</i>   | 0.7   | 5.2   | 0.5       | 0.4       | 0.5            | 0.3   | 0.2       | 0.2       | 1.6      |
| NM_207608    | <i>Trpa1</i>   | 0.2   | 0.4   | 0.3       | 0.3       | 0.2            | 1.4   | 0.3       | 0.7       | 0.1      |
| NM_053294    | <i>Adora2a</i> | 0.1   | 0.1   | 0.1       | 0.1       | 0.1            | 0.1   | 0.1       | 0.1       | 0.1      |
| NM_001357942 | <i>Adora2a</i> | 0.1   | 0.1   | 0.1       | 0.1       | 0.1            | 0.1   | 0.1       | 0.1       | 0.1      |
| NM_012585    | <i>Htr1a</i>   | 0.9   | 4.4   | 5.2       | 6.6       | 0.1            | 0.2   | 0.1       | 0.1       | 0.1      |
| NM_001145367 | <i>Pparg</i>   | 0.1   | 0.1   | 0.1       | 0.1       | 0.1            | 0.1   | 0.1       | 0.1       | 4.4      |
| NM_001145366 | <i>Pparg</i>   | 0.1   | 0.1   | 0.1       | 0.1       | 0.1            | 0.1   | 0.1       | 0.1       | 0.3      |
| NM_013124    | <i>Pparg</i>   | 0.1   | 0.1   | 0.1       | 0.1       | 0.1            | 0.1   | 0.1       | 0.1       | 0.1      |
| NM_012547    | <i>Drd2</i>    | 7.3   | 9.0   | 3.9       | 4.8       | 2.5            | 0.5   | 0.3       | 0.3       | 0.1      |

Mean normalised counts per million (CPMs) of all cannabidiol receptors and their variants mined from RNA-sequencing datasets from brain and choroid plexus at E19, P5 and adult (male and female) and E19 placenta. n = 4 for all groups. Standard deviation (SD) is listed in Table 13 for transcripts with expression >1 CPM.
